# Supplementary material for: Exogenous Proline Improves Salt Tolerance of Alfalfa through Modulation of Antioxidant Capacity, Ion Homeostasis, and Proline Metabolism
Source: MDPI journal article supplement (doi:10.3390/plants11212994), 2022-11-07
Supplement: s1 [file Supplementary Table S1.pdf › Supplementary Table S1.pdf]

## Supplementary Material

**Table S1.** List of primers used in qRT-PCR.

| Primer Name | Primer sequences (5'-3')  |
|-------------|---------------------------|
| P5CS1-F     | AGATTGGGCAGAGGGGGTAT      |
| P5CS1-R     | GAACTGTTACGTGCTGCGAC      |
| P5CS2-F     | TGGTCCCTCGAGGCAGTAAT      |
| P5CS2-R     | TCG TTCAGTCCACCGTTTCC     |
| OAT-F       | TGGAGTCGAGCTTAACAGCG      |
| OAT-R       | AGGAGCAGCATCTTTTGGCT      |
| ProDH-F     | TGGACGTTGGAATATGGGCTA     |
| ProDH-R     | AAGCATGCCACGTAAGCCA       |
| Cu/Zn-SOD-F | GATGGAACCGCAAGCTTCAC      |
| Cu/Zn-SOD-R | GCTCATGACCACCTTTCCCA      |
| CAT-F       | TTACAGCCCGATCCAACGAC      |
| CAT-R       | GCCAATGACACTTCCCATGC      |
| APX-F       | TGAAGTTCCTTTCCACCCCG      |
| APX-R       | TAGAAGTCCATGGGCCCTCA      |
| SOS1-F      | TGGAGTTGGAAAACGTCGCT      |
| SOS1-R      | ACGCAAGGCCAATTCCTACA      |
| HKT1-F      | TGCTTATGGGAACGTAGGGT      |
| HKT1-R      | CAGGCTTTGCCTCCATTCAT      |
| NHX1-F      | TGTGCTCTGGAGTGGTGGTA      |
| NHX1-R      | ATAGCCCCAATGGCTAGGTG      |
| Actin-F     | TTTGAGACTTTCAATGTGCCCCGCC |
| Actin-R     | TAGCATGTGGGAGTGCATAACCCT  |
